# Supplementary material for: Regulatory Policies for Alcohol, other Psychoactive Substances and Addictive Behaviours: The Role of Level of Use and Potency. A Systematic Review
Source: PubMed Central journal article supplement (PMC6801613; doi:10.3390/ijerph16193749), 2019-10-04

## Supplementary Materials

**Table S1: Search strategy**

| No.                                          | Searches                                                                                                                                                                                            | Results |
|----------------------------------------------|-----------------------------------------------------------------------------------------------------------------------------------------------------------------------------------------------------|---------|
| <b>Study type terms</b>                      |                                                                                                                                                                                                     |         |
| 1                                            | (systematic review or meta-analysis).mp. [mp=ti, ab, ot, nm, hw, fx, kf, ox, px, rx, ui, sy, tn, dm, mf, dv, kw, dq]                                                                                | 664414  |
| 2                                            | limit 1 to humans                                                                                                                                                                                   | 588466  |
| <b>Exposure terms</b>                        |                                                                                                                                                                                                     |         |
| 3                                            | (marijuana or cannabis).mp. or exp Cannabis/ or exp "cannabis use"/ or exp cannabis smoking/ or exp "Cannabis (genus)"/                                                                             | 82169   |
| 4                                            | opioids.mp. or exp Analgesics, Opioid/ or exp opiate/                                                                                                                                               | 473840  |
| 5                                            | exp tobacco smoke/ or exp "tobacco use"/ or exp tobacco/ or exp smokeless tobacco/ or exp chewing tobacco/ or tobacco.mp. or exp tobacco consumption/                                               | 587217  |
| 6                                            | exp gambling/ or gambling.mp. or exp pathological gambling/                                                                                                                                         | 18591   |
| 7                                            | (alcohol* adj3 (drink* or consum* or intake)).mp. or exp drinking behavior/ or exp alcoholic beverage/                                                                                              | 333308  |
| 8                                            | 3 or 4 or 5 or 6 or 7                                                                                                                                                                               | 1383650 |
| <b>Different policy and regulation terms</b> |                                                                                                                                                                                                     |         |
| 9                                            | exp Policy/ or exp Public Policy/ or policy.mp. or exp Health Policy/ or regulation.mp.                                                                                                             | 3543740 |
| 10                                           | exp Policy/ or exp Public Policy/ or policy.mp. or exp Health Policy/ or regulation.mp. or exp regulatory mechanism/                                                                                | 4009570 |
| 11                                           | exp Policy/ or exp Public Policy/ or policy.mp. or exp Health Policy/ or regulation.mp. or exp regulatory mechanism/ or exp Policy Making/                                                          | 5032816 |
| <b>Potency and dosage terms</b>              |                                                                                                                                                                                                     |         |
| 12                                           | exp drug dose/ or exp maximum permissible dose/ or exp dose/ or exp dose calculation/ or dose.mp. or exp dose response/ or exp maximum tolerated dose/ or exp recommended drug dose/ or potency.mp. | 3956167 |
| 13                                           | 2 and 8 and 9 and 12                                                                                                                                                                                | 173     |
| 14                                           | remove duplicates from 13                                                                                                                                                                           | 167     |
| 15                                           | 2 and 8 and 10 and 12                                                                                                                                                                               | 281     |
| 16                                           | remove duplicates from 15                                                                                                                                                                           | 275     |
| 17                                           | 2 and 8 and 11 and 12                                                                                                                                                                               | 484     |
| 18                                           | remove duplicates from 17                                                                                                                                                                           | 474     |

Databases searched: OVID Medline and Embase, August 19th 2019

**Figure S1: PRISMA flow-chart on selection of relevant reviews**

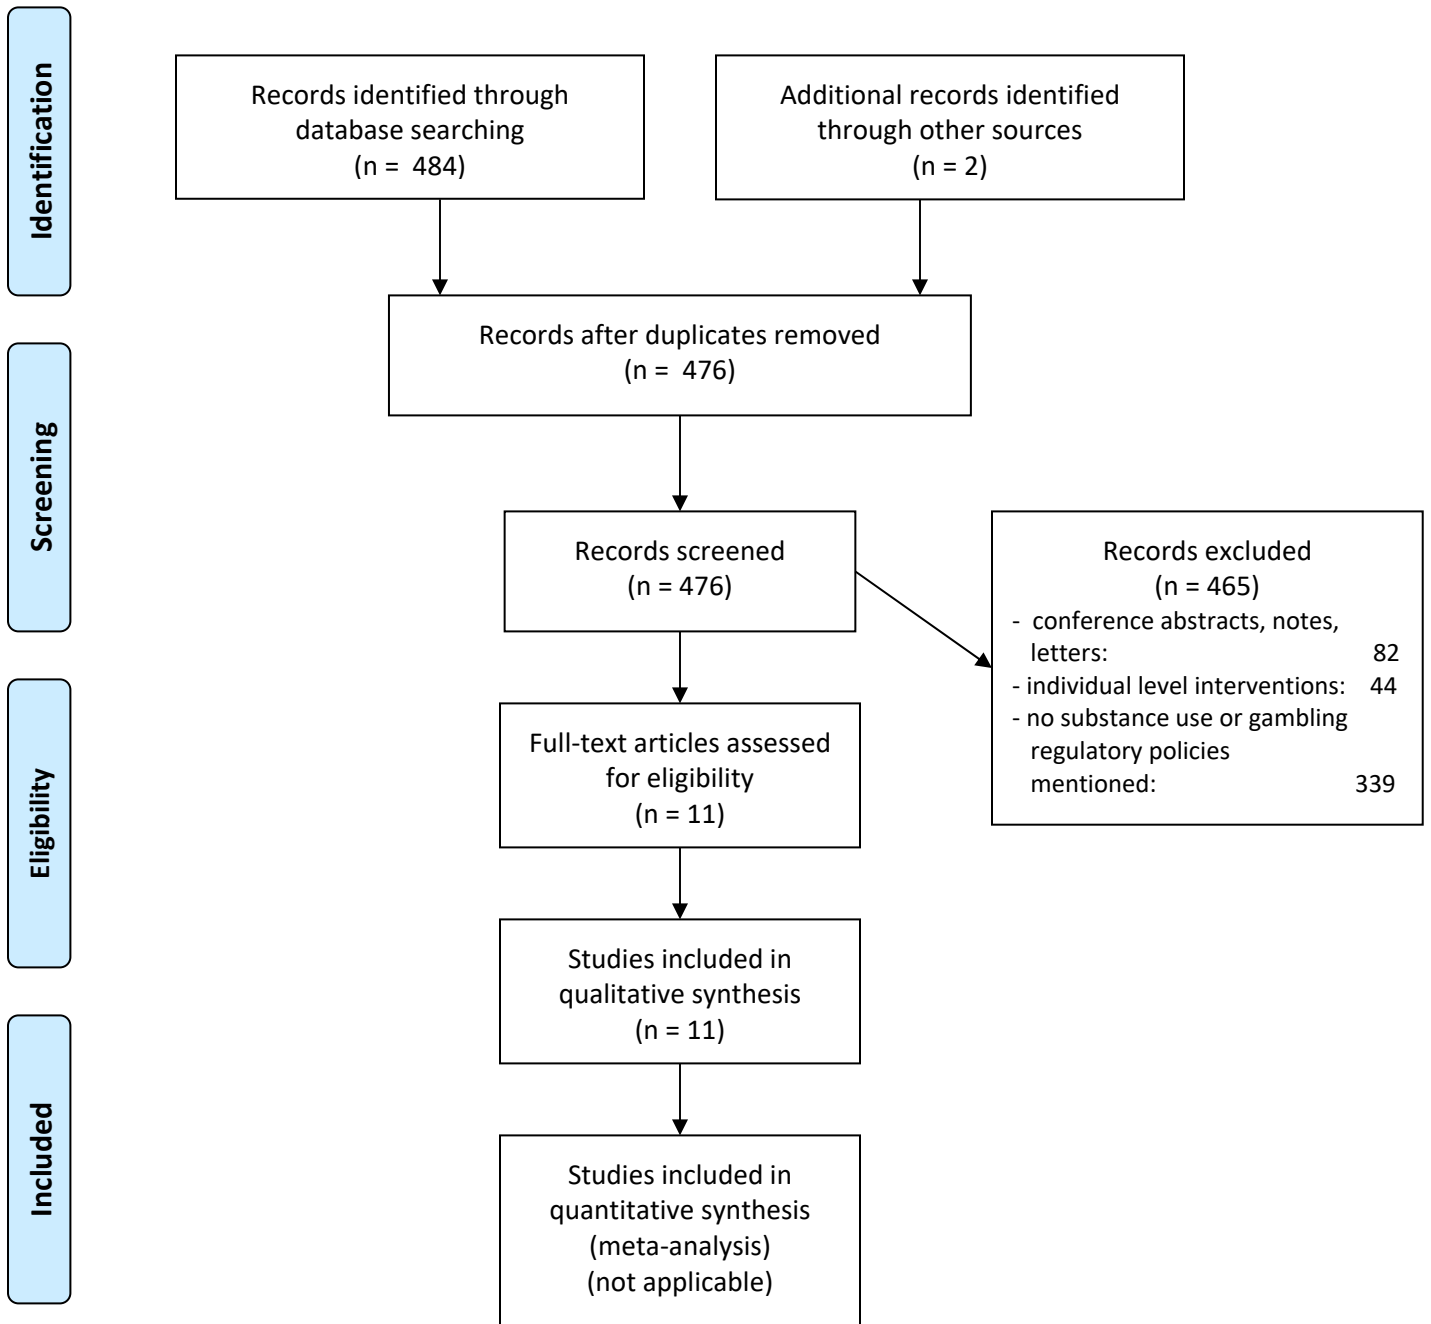

Supplement: ijerph-16-03749-s001.pdf [file ijerph-16-03749-s001.pdf]
